# Supplementary material for: Boulder transport and wave height of a seventeenth century South China Sea tsunami on Penghu Islands, Taiwan
Source: Copernicus journal article supplement (doi:10.5194/nhess-2022-293), 2023-02-02
Supplement: Supplementary file [file nhess-2022-293-RC3-supplement.pdf]

Incipient motion formulas copied from Nandasena et al. (2022)

| Type of movement      | Pre-setting conditions                                                                             |                                                                                |                                                                   |
|-----------------------|----------------------------------------------------------------------------------------------------|--------------------------------------------------------------------------------|-------------------------------------------------------------------|
|                       | SB/SA                                                                                              | JBB                                                                            | CEB                                                               |
| Sliding               | $\frac{2C_{vv}(\rho_s/\rho_w - 1)gc(\mu_s \cos \theta + \sin \theta)}{C_{dv}(c/b) + \mu_s C_{lv}}$ | -                                                                              | -                                                                 |
| Overturning           | $\frac{2C_{vv}(\rho_s/\rho_w - 1)gc(\cos \theta + (c/b)\sin \theta)}{C_{dv}(c^2/b^2) + C_{lv}}$    | -                                                                              | $\frac{2C_{vv}(\rho_s/\rho_w - 1)gc}{C_{lv} - C_{dv}(c^2/b^2)}$   |
| Saltation/<br>lifting | $\frac{2C_{vv}(\rho_s/\rho_w - 1)gc(\cos \theta)}{C_{lv}}$                                         | $\frac{2C_{vv}(\rho_s/\rho_w - 1)gc(\cos \theta + \mu_s \sin \theta)}{C_{lv}}$ | $\frac{2C_{vv}(\rho_s/\rho_w - 1)gc}{C_{lv} - \mu_s C_{dv}(c/b)}$ |

Application of Fr number to calculate flow depth from flow velocity

$$F_r = \frac{u}{\sqrt{gh}}$$

$$h = \frac{u^2}{gF_r^2}$$

Therefore, the formulas for flow depth (wave height, h)

| Type of movement      | Pre-setting conditions                                                                                    |                                                                                     |                                                                          |
|-----------------------|-----------------------------------------------------------------------------------------------------------|-------------------------------------------------------------------------------------|--------------------------------------------------------------------------|
|                       | SB/SA                                                                                                     | JBB                                                                                 | CEB                                                                      |
| Sliding               | $\frac{2C_{vv}(\rho_s/\rho_w - 1)c(\mu_s \cos \theta + \sin \theta)}{F_r^2 [C_{dv}(c/b) + \mu_s C_{lv}]}$ | -                                                                                   | -                                                                        |
| Overturning           | $\frac{2C_{vv}(\rho_s/\rho_w - 1)c(\cos \theta + (c/b)\sin \theta)}{F_r^2 [C_{dv}(c^2/b^2) + C_{lv}]}$    | -                                                                                   | $\frac{2C_{vv}(\rho_s/\rho_w - 1)c}{F_r^2 [C_{lv} - C_{dv}(c^2/b^2)]}$   |
| Saltation/<br>lifting | $\frac{2C_{vv}(\rho_s/\rho_w - 1)c(\cos \theta)}{F_r^2 C_{lv}}$                                           | $\frac{2C_{vv}(\rho_s/\rho_w - 1)c(\cos \theta + \mu_s \sin \theta)}{F_r^2 C_{lv}}$ | $\frac{2C_{vv}(\rho_s/\rho_w - 1)c}{F_r^2 [C_{lv} - \mu_s C_{dv}(c/b)]}$ |

For tsunami  $F_r = 2$ , for storms  $F_r = 1$  (according to Nott's assumption)

The formulas given in the manuscript should be corrected if the authors referred to Nandasena et al. (2022).

Therefore, the formulas for storms should be given as:

**Your first equation has typo – you need to fix it as follow.**

| Type of movement      | SB/SA                                                                                                      | JBB                                                                                  |
|-----------------------|------------------------------------------------------------------------------------------------------------|--------------------------------------------------------------------------------------|
| Sliding               | $H \geq \frac{2C_{vv}(\rho_s/\rho_w - 1)c(\mu_s \cos \theta + \sin \theta)}{[C_{dv}(c/b) + \mu_s C_{lv}]}$ | -                                                                                    |
| Overturning           | $H \geq \frac{2C_{vv}(\rho_s/\rho_w - 1)c(\cos \theta + (c/b)\sin \theta)}{[C_{dv}(c^2/b^2) + C_{lv}]}$    | -                                                                                    |
| Saltation/<br>lifting | $H \geq \frac{2C_{vv}(\rho_s/\rho_w - 1)c(\cos \theta)}{C_{lv}}$                                           | $H \geq \frac{2C_{vv}(\rho_s/\rho_w - 1)c(\cos \theta + \mu_s \sin \theta)}{C_{lv}}$ |
